# Supplementary material for: Hydrogenation of succinic acid over supported rhenium catalysts prepared by the microwave-assisted thermolytic method
Source: Royal Society of Chemistry journal article supplement (doi:10.1039/c5cy00004a), 2015-01-01
Supplement: c5cy00004a1.pdf [file c5cy00004a1.pdf]

# **Hydrogenation of bio-derived succinic acid over supported rhenium catalysts prepared by microwave-assisted thermolytic method**

Xin Di <sup>a</sup>, Zhengfeng Shao <sup>a</sup>, Chuang Li <sup>a</sup>, Wenzhen Li <sup>b</sup> and Changhai Liang <sup>a,\*</sup>

<sup>a</sup> Laboratory of Advanced Materials and Catalytic Engineering, Dalian University of Technology, Dalian 116024, China. Tel/Fax: +86 411 84986353; E-mail address: changhai@dlut.edu.cn.

<sup>b</sup> DCBE, Biorenewables Research Laboratory, Iowa State University, Iowa 50011, USA.

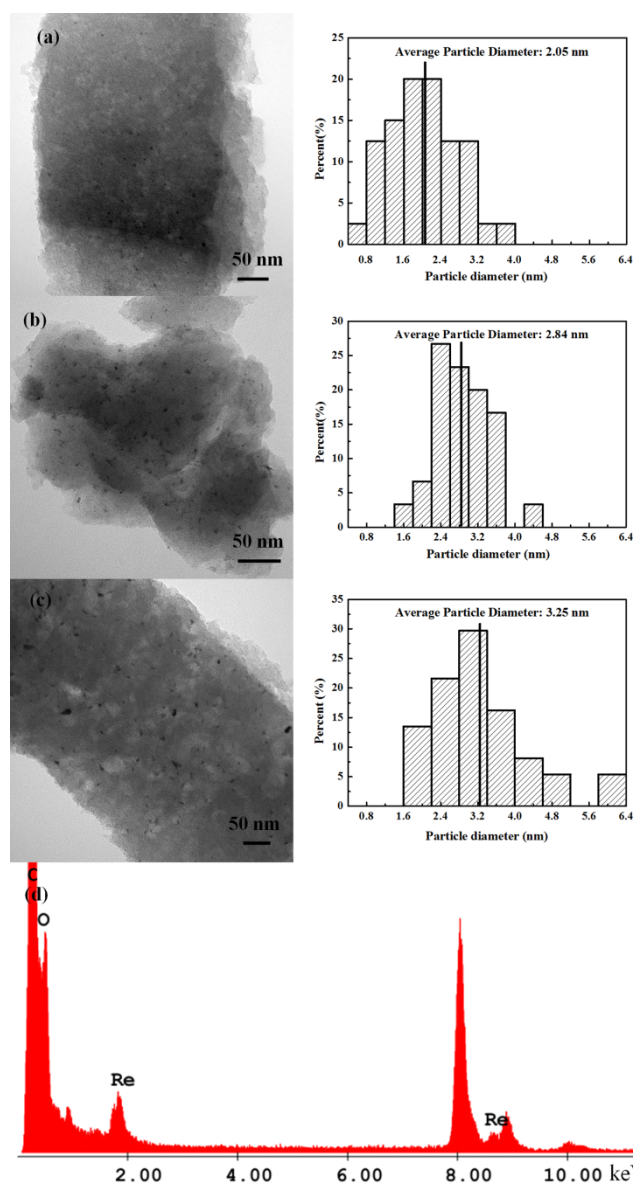

Fig. 1S TEM images of supported Re catalysts (a: Re/C-5, b: Re/C-7, c: Re/C-10) and (d) the EDX spectra of Re/C-5.

In Fig. 1S, above 100 particles were measured when calculating the average particle size of Re/C-5 catalyst. Fig. 1S(d) shows the EDX spectra of Re/C-5. The characteristic peak at 8.05 keV corresponds to Cu-K $\alpha$  energy from the substrate material. The EDX spectra also shows that the catalysts have C-K $\alpha$  (0.31 keV) and O-K $\alpha$  (0.53 keV). The peaks at 1.84 keV, 8.63 keV and 10.01 keV are attributed to Re-M $\alpha$ , Re-L $\alpha$  and Re-L $\beta$  respectively.<sup>[1]</sup>

---

**Table 1S.** ICP results of rhenium in reaction liquid.

| Recycle                       | 1        | 2        | 3        | 4        | 5        |
|-------------------------------|----------|----------|----------|----------|----------|
| Re content in reaction liquid | 0.17 ppm | 0.17 ppm | 0.18 ppm | 0.19 ppm | 0.21 ppm |

---

## Reference

- 1 A.V. Uscategui, E. Mosquera, L. Cifuentes, Mater. Lett., 2013, 94, 44-46.
